# Supplementary material for: Introducing new lightning schemes into the CHASER (MIROC) chemistry–climate model
Source: Copernicus journal article supplement (doi:10.5194/gmd-15-5627-2022), 2022-07-21
Supplement: Supplementary file 1 [file gmd-15-5627-2022-supplement.pdf]

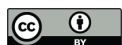

*Supplement of*

## **Introducing new lightning schemes into the CHASER (MIROC) chemistry–climate model**

**Yanfeng He et al.**

*Correspondence to:* Yanfeng He (hyf412694462@gmail.com)

The copyright of individual parts of the supplement might differ from the article licence.

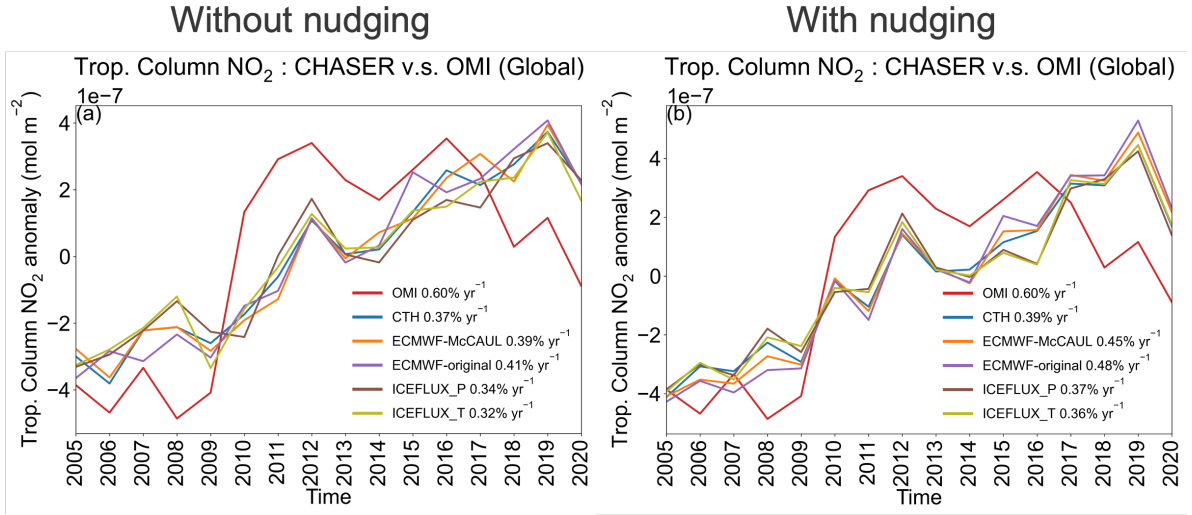

**Figure S1:** The comparisons between the annual global mean OMI tropospheric column NO<sub>2</sub> anomaly and the CHASER annual global mean tropospheric column NO<sub>2</sub> anomaly from 2005 to 2020. All the modelled trends displayed are simulated with interannually varying LNO<sub>x</sub> emissions (The first set of experiments).

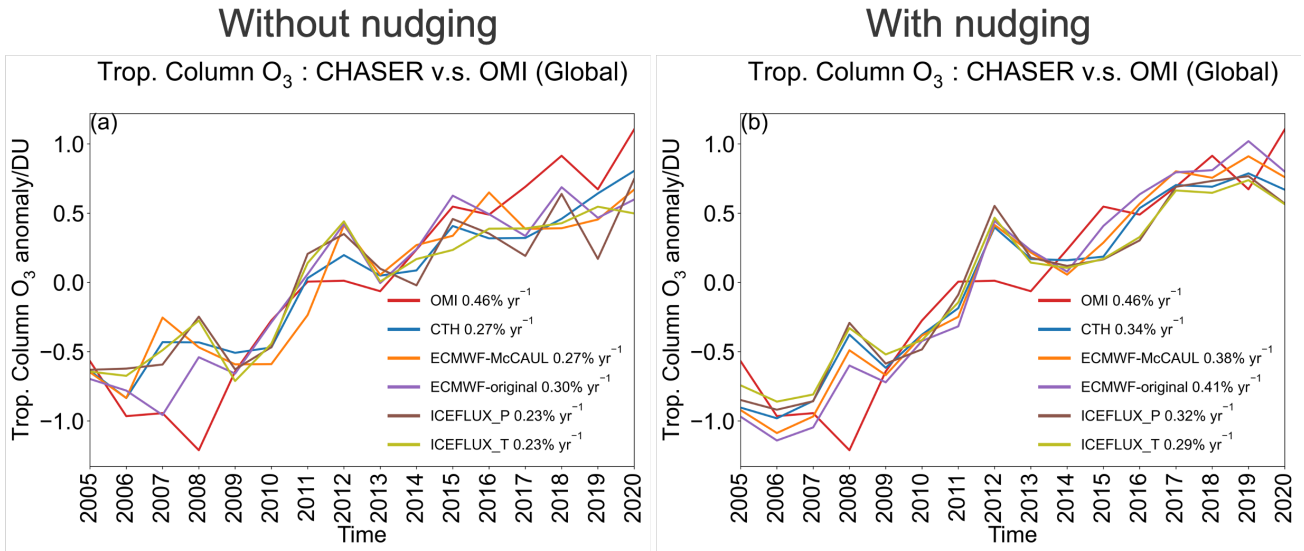

**Figure S2:** The comparisons between the annual global mean OMI/MLS tropospheric column O<sub>3</sub> anomaly and the CHASER annual global mean tropospheric column O<sub>3</sub> anomaly from 2005 to 2020. All the modelled trends displayed are simulated with interannually varying LNO<sub>x</sub> emissions (The first set of experiments).
